# Supplementary material for: Loss of LKB1 Protein Expression Correlates with Increased Risk of Recurrence and Death in Patients with Resected, Stage II or III Colon Cancer
Source: PubMed Central journal article supplement — Cancer Res Treat. 2019 Mar 20;51(4):1518–26. doi: 10.4143/crt.2019.008 (PMC6790836; doi:10.4143/crt.2019.008), 2019-03-20
Supplement: crt-2019-008-suppl1.pdf [file crt-2019-008-suppl1.pdf]

**S1 Table.** Sequence of the primers and probes of all reference and target genes

| <b>Gene</b>  | <b>Forward primer</b>           | <b>5'-labeled (6FAM) probe</b>  | <b>Reverse primer</b>          |
|--------------|---------------------------------|---------------------------------|--------------------------------|
| <i>c-MYC</i> | 5'-GAGCCCCTGGTGCTCCAT-3'        | 5'AGGAGACACCGCCAC-3'            | 5'TCA TCTTCTTGTCCTCCTCAGAGT-3' |
| <i>ERCC1</i> | 5'GGGAATTTGGCGACG TAATTC-3'     | 5'CACAGGTGCTCTGGC CCAGCACATA-3' | 5'GCGGAGGCTGAGGAACAG-3'        |
| <i>NEDD9</i> | 5'-GGGTAAAAAGGTGATAACCCCGT-3'   | 5'-CAAGGGCCTTAT ATGAC-3'        | 5'TGCTGATGAGGGAGGGATGTCGT-3    |
| <i>TS</i>    | 5'AATCACATCGAGCCA CTG AAA AT-3' | 5'CAG CTT CAG CGA GAA C-3'      | 5'AATCCTGAGCTTTGGGAAAGG-3'     |
