# Supplementary material for: Loss of LKB1 Protein Expression Correlates with Increased Risk of Recurrence and Death in Patients with Resected, Stage II or III Colon Cancer
Source: PubMed Central journal article supplement — Cancer Res Treat. 2019 Mar 20;51(4):1518–26. doi: 10.4143/crt.2019.008 (PMC6790836; doi:10.4143/crt.2019.008), 2019-03-20
Supplement: crt-2019-008-suppl2.pdf [file crt-2019-008-suppl2.pdf]

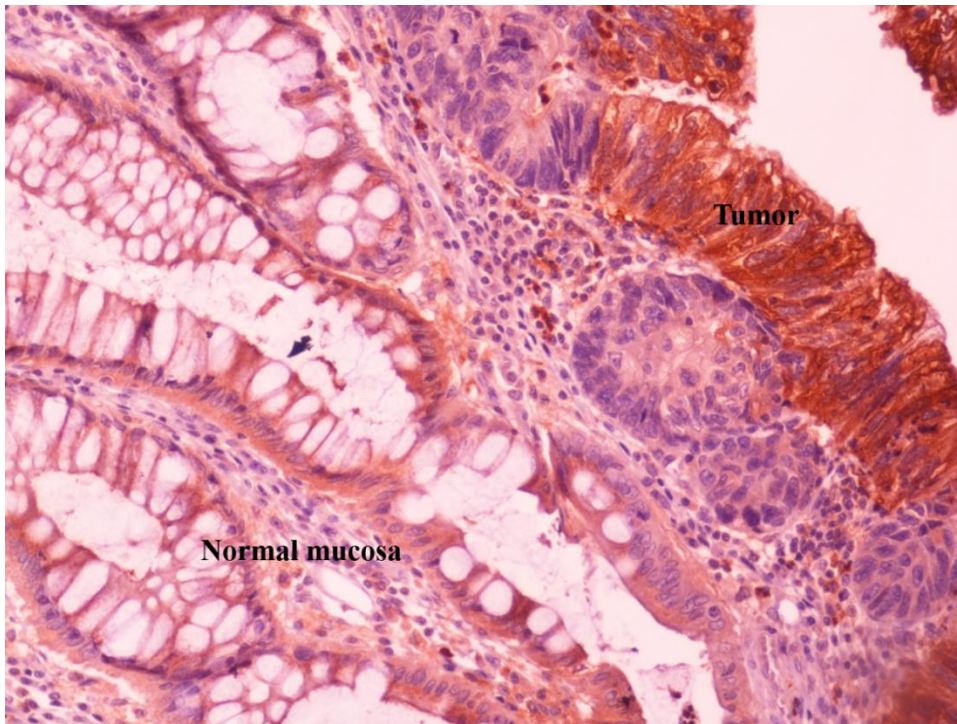

**S2 Fig.** LKB1 positive cytoplasmic expression in normal mucosa (score 1), intense expression in tumor cells (score 3) ( $\times 200$ ).
