# Supplementary material for: Loss of LKB1 Protein Expression Correlates with Increased Risk of Recurrence and Death in Patients with Resected, Stage II or III Colon Cancer
Source: PubMed Central journal article supplement — Cancer Res Treat. 2019 Mar 20;51(4):1518–26. doi: 10.4143/crt.2019.008 (PMC6790836; doi:10.4143/crt.2019.008), 2019-03-20
Supplement: crt-2019-008-suppl3.pdf [file crt-2019-008-suppl3.pdf]

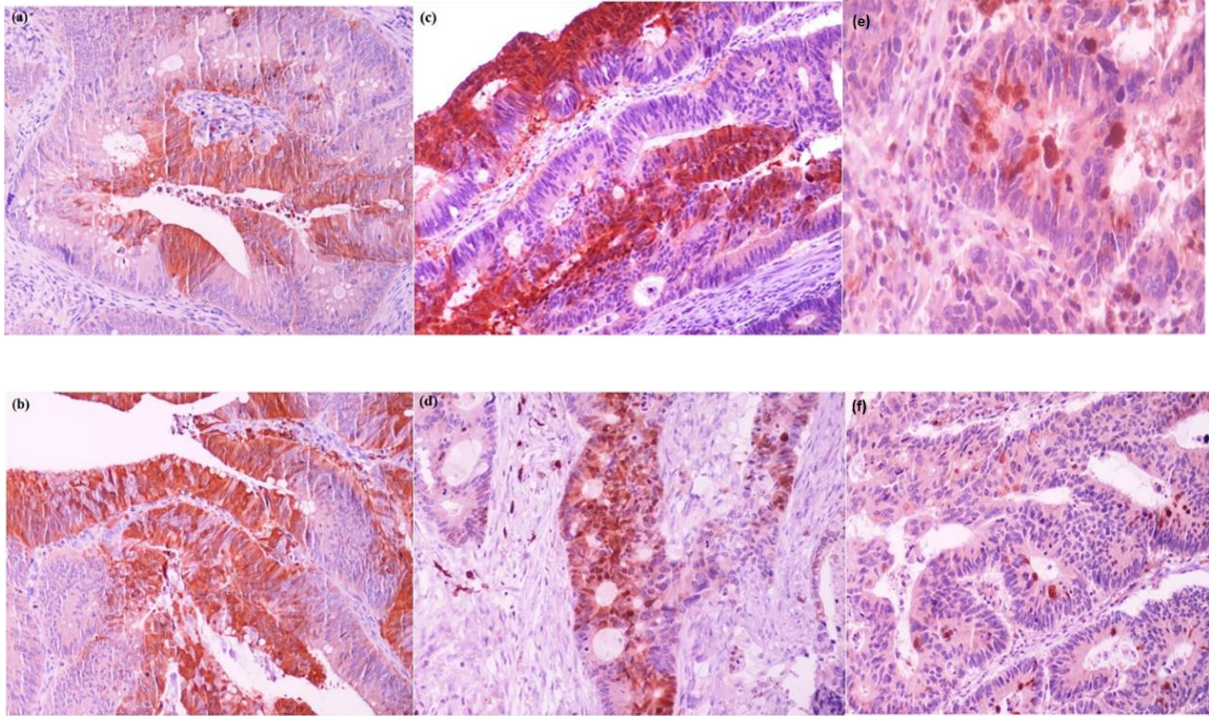

**S3 Fig.** (A, B) LKB1 cytoplasmic expression in tumor cells ( $\times 200$ ). (C, D) LKB1 cytoplasmic and nuclear expression in tumor cells ( $\times 200$ ). (E, F) Exclusive nuclear expression of LKB1 in tumor cells (E,  $\times 200$ ; F,  $\times 100$ ).
