# Supplementary material for: Loss of LKB1 Protein Expression Correlates with Increased Risk of Recurrence and Death in Patients with Resected, Stage II or III Colon Cancer
Source: PubMed Central journal article supplement — Cancer Res Treat. 2019 Mar 20;51(4):1518–26. doi: 10.4143/crt.2019.008 (PMC6790836; doi:10.4143/crt.2019.008), 2019-03-20
Supplement: crt-2019-008-suppl5.pdf [file crt-2019-008-suppl5.pdf]

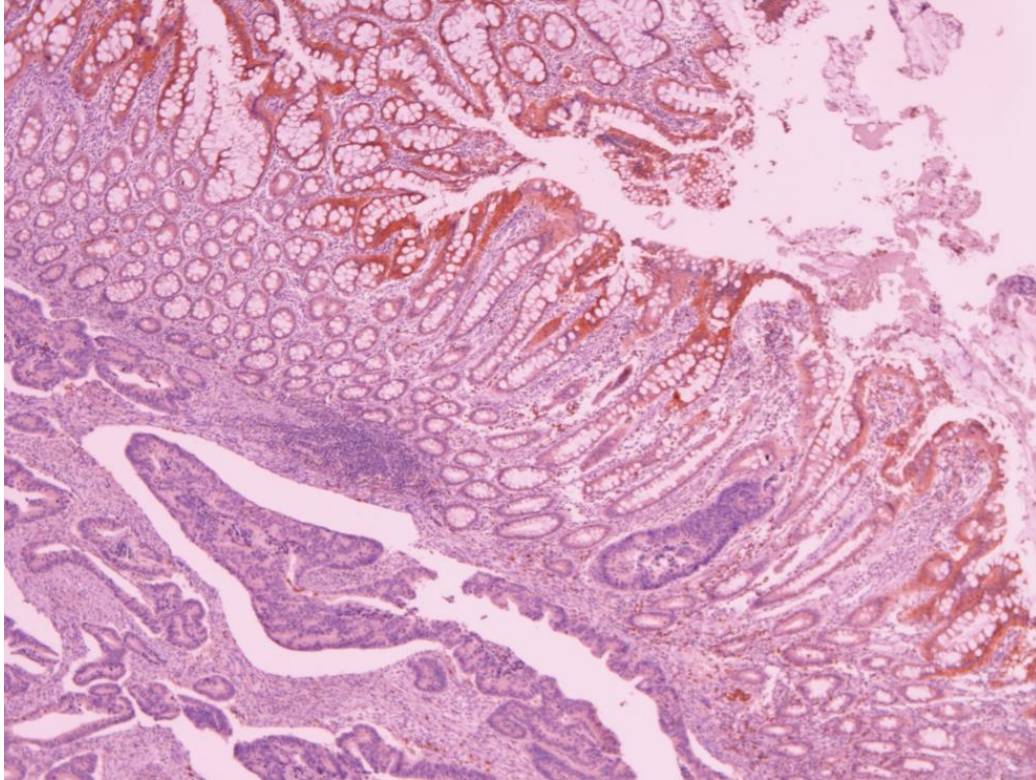

**S5 Fig.** LKB1 positive expression in normal crypts of large bowel intestine, negative expression in colon adenocarcinoma ( $\times 100$ ).
